# Supplementary material for: Clinical outcomes of patients receiving prolonged extracorporeal membrane oxygenation for respiratory support
Source: PubMed Central journal article supplement — Ther Adv Respir Dis. 2019 May 15;13:1753466619848941. doi: 10.1177/1753466619848941 (PMC6535699; doi:10.1177/1753466619848941), 2019-05-15
Supplement: TAR-18-100_R1_Supplementary_tables.pdf [file TAR-18-100_R1_Supplementary_tables.pdf]

Supplementary table S1. Characteristics of participating centers

| Characteristics                   | No. of hospitals |
|-----------------------------------|------------------|
| Number of hospital beds           |                  |
| < 500 beds                        | 1 (6.3%)         |
| 500-1000 beds                     | 9 (56.3%)        |
| 1001-1500 beds                    | 3 (18.8%)        |
| > 1500 beds                       | 3 (18.8%)        |
| Number of ICU beds                |                  |
| < 50 beds                         | 5 (31.3%)        |
| 51-100 beds                       | 9 (56.3%)        |
| > 100 beds                        | 2 (12.5%)        |
| ICU patient-to-intensivist ratios |                  |
| < 10 beds                         | 1 (6.3%)         |
| 10-20 beds                        | 11 (68.8%)       |
| 21-30 beds                        | 1 (6.3%)         |
| > 30 beds                         | 3 (18.8%)        |
| Lung transplantation center       | 5 (31.3%)        |

ICU, intensive care unit.

Supplementary table S2. Hospital mortality by centers

| Participating center | Short-term group<br>(n=411) | Long-term group<br>(n=76) | P-value |
|----------------------|-----------------------------|---------------------------|---------|
| A                    | 51/92 (55.4%)               | 4/9 (44.4%)               | 0.728   |
| B                    | 1/3 (33.3%)                 | 0/0 (0.0%)                | -       |
| C                    | 4/4 (100.0%)                | 0/0 (0.0%)                | -       |
| D                    | 27/54 (50.0%)               | 10/16 (62.5%)             | 0.379   |
| E                    | 29/40 (72.5%)               | 7/8 (87.5%)               | 0.659   |
| F                    | 1/4 (25.0%)                 | 0/0 (0.0%)                | -       |
| G                    | 68/99 (68.7%)               | 11/18 (61.1%)             | 0.528   |
| H                    | 24/34 (70.6%)               | 11/15 (73.3%)             | >0.999  |
| I                    | 4.5/10 (40.0%)              | 0.5/1 (100.0%)            | 0.455   |
| J                    | 5/6 (83.3%)                 | 0/0 (0.0%)                | -       |
| K                    | 3/6 (50.0%)                 | 2/2 (100.0%)              | 0.464   |
| L                    | 11/12 (91.7%)               | 0/0 (0.0%)                | -       |
| M                    | 1/1 (100.0%)                | 1/1 (100.0%)              | -       |
| N                    | 12/36 (33.3%)               | 3/3 (100.0%)              | 0.05    |
| O                    | 8/8 (100.0%)                | 3/3 (100.0%)              | -       |
| P                    | 1/2 (50.0%)                 | 0/0 (0.0%)                | -       |

Supplementary table S3. Hospital mortality by time period

| Year | Short-term group<br>(n=411) | Long-term group<br>(n=76) | <i>P</i> -value |
|------|-----------------------------|---------------------------|-----------------|
| 2012 | 68/98 (69.4%)               | 4/6 (66.7%)               | >0.999          |
| 2013 | 54/82 (65.9%)               | 13/18 (72.2%)             | 0.603           |
| 2014 | 57/115 (49.6%)              | 9/16 (56.3%)              | 0.616           |
| 2015 | 71/116 (61.2%)              | 27/36 (75.0%)             | 0.131           |

Supplementary table S4. Hospital mortality by lactate clearance 4 hours after cannulation

| Lactate clearance                                                                         | Short-term group<br>(n=139) | Long-term group<br>(n=21) | <i>P</i> -value |
|-------------------------------------------------------------------------------------------|-----------------------------|---------------------------|-----------------|
| Lactate level < 2 mmol/L before and after cannulation                                     | 8/27 (29.6%)                | 2/6 (33.3%)               | >0.009          |
| Increased lactate level after cannulation                                                 | 57/78 (73.1%)               | 7/9 (77.8%)               | >0.009          |
| Lactate level ≥ 2 mmol/L before cannulation and lactate clearance < 50% after cannulation | 15/25 (60.0%)               | 3/5 (60.0%)               | >0.009          |
| Lactate level ≥ 2 mmol/L before cannulation and lactate clearance >50% after cannulation  | 6/9 (66.7%)                 | 1/1 (100.0%)              | >0.009          |

Supplementary table S5. Comparison between survivors and non-survivors

| Characteristics             | Survivor<br>(n=184) | Non-survivor<br>(n=303) | <i>P</i> -value |
|-----------------------------|---------------------|-------------------------|-----------------|
| Age, years                  | 51 (37-62)          | 61 (52-69)              | <0.001          |
| Male                        | 128 (69.6)          | 193 (63.7)              | 0.185           |
| Primary diagnosis           |                     |                         | 0.002           |
| Viral pneumonia             | 20 (10.9)           | 23 (7.6)                |                 |
| Bacterial pneumonia         | 34 (18.5)           | 80 (26.4)               |                 |
| Asthma/COPD                 | 4 (2.2)             | 3 (1.0)                 |                 |
| Trauma/Burn                 | 17 (9.2)            | 7 (2.3)                 |                 |
| Asphyxia                    | 0 (0.0)             | 4 (1.3)                 |                 |
| Interstitial lung disease   | 12 (6.5)            | 36 (11.9)               |                 |
| Chronic respiratory failure | 7 (3.8)             | 14 (4.6)                |                 |
| Other respiratory failure   | 90 (48.9)           | 136 (44.9)              |                 |
| SOFA scores before ECMO     | 10 (7-13)           | 12 (9-15)               | 0.001           |
| RESP scores                 | 1 (0-3)             | -1 (-2-2)               | <0.001          |
| PRESERVE scores             | 4 (3-6)             | 6 (4-7)                 | <0.001          |

|                                               |                  |                  |        |
|-----------------------------------------------|------------------|------------------|--------|
| MV before ECMO                                |                  |                  |        |
| Duration of MV, days                          | 1 (0-4)          | 2 (0-7)          | 0.001  |
| MV settings                                   |                  |                  |        |
| FiO <sub>2</sub> , %                          | 1.0 (0.8-1.0)    | 1.0 (0.9-1.0)    | 0.295  |
| PEEP, cmH <sub>2</sub> O                      | 10 (6-12)        | 10 (6-11)        | 0.273  |
| Peak inspiratory pressure, cmH <sub>2</sub> O | 26 (23-30)       | 30 (25-34)       | <0.001 |
| Minute ventilation, L/min                     | 9.4 (6.7-12.7)   | 9.7 (7.6-12.4)   | 0.352  |
| Arterial blood gas before ECMO                |                  |                  |        |
| pH                                            | 7.27 (7.18-7.37) | 7.28 (7.16-7.38) | 0.783  |
| PaCO <sub>2</sub> , mmHg                      | 48.0 (38.0-64.0) | 52.0 (39.0-66.0) | 0.136  |
| PaO <sub>2</sub> , mmHg                       | 64.0 (51.0-76.0) | 61.0 (51.2-76.0) | 0.606  |
| HCO <sub>3</sub> , mmol/L                     | 22.1 (18.0-28.8) | 23.1 (19.2-28.1) | 0.319  |
| SaO <sub>2</sub> , %                          | 89.0 (79.9-93.4) | 88.0 (78.7-92.7) | 0.183  |
| Laboratory variables before ECMO              |                  |                  |        |
| C-reactive protein, mg/dL                     | 10.7 (2.6-19.8)  | 12.0 (5.9-23.0)  | 0.074  |
| Hemoglobin, g/dL                              | 11.3 (9.3-13.2)  | 10.2 (8.8-12.0)  | <0.001 |
| Platelets, 10 <sup>3</sup> /mm <sup>3</sup>   | 166 (107-253)    | 129 (70-208)     | <0.001 |
| Total bilirubin, mg/dL                        | 0.8 (0.5-1.4)    | 0.9 (0.5-2.2)    | 0.211  |
| AST, IU/L                                     | 48 (30-92)       | 48 (30-118)      | 0.601  |
| ALT, IU/L                                     | 29 (15-62)       | 35 (17-84)       | 0.601  |
| BUN, mg/dL                                    | 18 (13-30)       | 26 (17-36)       | <0.001 |
| Creatinine, mg/dL                             | 1.00 (0.69-1.53) | 0.96 (0.67-1.54) | 0.583  |
| LDH, IU/L                                     | 623 (407-940)    | 770 (450-1200)   | 0.049  |
| Lactate, mmol/L                               | 1.8 (1.2-4.6)    | 2.9 (1.7-6.3)    | 0.002  |
| Initial mode of ECMO                          |                  |                  | 0.049  |
| Veno-venous                                   | 169 (91.9)       | 256 (84.5)       |        |
| Veno-arterial                                 | 10 (5.4)         | 36 (11.9)        |        |
| Others*                                       | 5 (2.7)          | 11 (3.6)         |        |
| Duration of ECMO support, days                | 7 (3-14)         | 9 (4-23)         | 0.011  |

Values are given as the median (interquartile range) or n (%).

\* Others include veno-venous-arterial, veno-veno-venous-arterial, and veno-arteriovenous.

ALT, alanine aminotransferase; AST, aspartate transaminase; BUN, blood urea nitrogen; COPD, chronic obstructive pulmonary disease; ECMO, extracorporeal membrane oxygenation; FiO<sub>2</sub>, fraction of inspired oxygen; LDH, lactate dehydrogenase; MV, mechanical ventilation; PaCO<sub>2</sub>, partial pressure of carbon dioxide in arterial blood; PaO<sub>2</sub>, partial pressure of oxygen in arterial blood; PEEP, positive end-expiratory pressure; PRESERVE, predicting death for severe ARDS on VV-ECMO; RESP, respiratory extracorporeal membrane oxygenation survival prediction; SaO<sub>2</sub>, arterial oxygen saturations; SOFA, sequential organ failure assessment.
